# Supplementary material
Source: PubMed Central journal article supplement (PMC7344788)
Supplement: jamacardiol-e202413-s002.pdf [file jamacardiol-e202413-s002.pdf]

## Supplementary Online Content

Puri R, Nissen SE, Arsenault BJ, et al. Effect of C-reactive protein on lipoprotein(a)-associated cardiovascular risk in optimally treated patients with high-risk vascular disease: a prespecified secondary analysis of the ACCELERATE trial. *JAMA Cardiol*. Published online July 8, 2020. doi:10.1001/jamacardio.2020.2413

**eTable 1.** Baseline Characteristics According to Achieved hsCRP Levels

**eTable 2.** Biochemistry and Blood Pressure Values at Baseline and Follow-up Within the Overall ACCELERATE hsCRP-Lp(a) Population

**eTable 3.** Clinical Event Rates Within the Overall ACCELERATE hsCRP-Lp(a) Population

**eTable 4.** Relationships Between MACE Stratified According to Achieved hsCRP and Lp(a) Quintiles in the Placebo Group Only

**eTable 5.** Associations Between MACE Stratified According to Achieved hsCRP and Continuous Lp(a) Levels in the Placebo Group Only

**eTable 6.** Relationships Between Primary MACE End Point Stratified According to Achieved hsCRP and Lp(a) Quintiles

**eTable 7.** Associations Between Primary MACE End Point Stratified According to Achieved hsCRP and Continuous Lp(a) Levels

**eTable 8.** Relationships Between hsCRP and Lp(a) as Continuous Variables Upon MACE

**eFigure 1.** Cumulative Incidence of MACE Over Time Stratified According to Lp(a) Quintiles in the Setting of hsCRP Levels <2 mg/L (A) or ≥2 mg/L (B)

**eFigure 2.** CONSORT Diagram

This supplementary material has been provided by the authors to give readers additional information about their work.

**eTable 1. Baseline Characteristics According to Achieved hsCRP Levels**

| Variable                      | ACCELERATE<br>N=12092 | ACCELERATE Lp(a)-CRP<br>N=10503 |
|-------------------------------|-----------------------|---------------------------------|
| Age, yrs                      | 64.4 ± 9.4            | 64.6 ± 9.4                      |
| Male sex, n (%)               | 9308 (77)             | 8135 (77.5)                     |
| Race, n (%)                   |                       |                                 |
| White                         | 9904/12029 (82.3)     | 8561/10442 (82)                 |
| Black                         | 294/12029 (2.4)       | 275/10442 (2.6)                 |
| Asian                         | 1290/12029 (10.7)     | 1095/10442 (10.5)               |
| Other                         | 541/12029 (4.5)       | 511/10442 (4.9)                 |
| BMI, kg/m <sup>2</sup>        | 30.2 ± 5.7            | 30.3 ± 5.7                      |
| Index diagnosis, n (%)        |                       |                                 |
| ACS                           | 3645 (30.1)           | 3024 (28.8)                     |
| Cerebrovascular disease       | 1440 (11.9)           | 1281 (12.2)                     |
| Peripheral arterial disease   | 1674 (13.8)           | 1471 (14)                       |
| Diabetes mellitus with CAD    | 7792 (64.4)           | 6838 (65.1)                     |
| Hypertension, n (%)           | 10573 (87.4)          | 9176 (87.4)                     |
| Diabetes (type 1 or 2), n (%) | 8236 (68.1)           | 7240 (68.9)                     |
| Prior MI, n (%)               | 7266/10887 (66.7)     | 6254/9443 (66.2)                |
| Prior PCI, n (%)              | 7763/10878 (71.4)     | 6806/9434 (72.1)                |
| Prior CABG, n (%)             | 3186/10880 (29.3)     | 2873/9436 (30.4)                |
| Medications, n (%)            |                       |                                 |
| Statins (any)                 | 11665 (96.5)          | 10134 (96.5)                    |
| High-intensity statins        | 5557/11947 (46.5)     | 4845/10373 (46.7)               |
| Anti-hypertensive agents      | 10564 (87.4)          | 9151 (87.1)                     |
| Aspirin                       | 10007 (82.8)          | 8805 (83.8)                     |
| Evacetrapib                   | 6038 (49.9)           | 5253 (50.0)                     |

Values are mean±SD or n (%)

BMI: body-mass index; ACS: acute coronary syndrome; CAD: coronary artery disease; MI: myocardial infarction; PCI: percutaneous coronary intervention; CABG: coronary artery bypass grafting

**eTable 2.** Biochemistry and Blood Pressure Values at Baseline and Follow-up Within the Overall ACCELERATE hsCRP-Lp(a) Population

| <b>Variable</b> | <b>Baseline</b>    | <b>Follow-up</b> | <b>P Value</b> |
|-----------------|--------------------|------------------|----------------|
| LDL (mg/dL)     | 81.3 ± 27.7        | 71.4 ± 28.1      | < 0.001        |
| HDL (mg/dL)     | 45.4 ± 11.7        | 71.5 ± 34.1      | < 0.001        |
| hsCRP (mg/L)    | 1.5 (0.7, 3.3)     | 1.8 (0.9, 3.9)   | < 0.001        |
| Lp(a) (nmol/L)  | 29.4 (11.2, 109.3) | 22.9 (9.5, 98.2) | < 0.001        |
| SBP (mmHg)      | 131.0 ± 16.6       | 132.0 ± 13.7     | < 0.001        |

LDL-C = low-density lipoprotein cholesterol; HDL-C = high-density lipoprotein cholesterol; hsCRP = high-sensitivity C-reactive protein; Lp(a) = lipoprotein(a); SBP = systolic blood pressure

**eTable 3.** Clinical Event Rates Within the Overall ACCELERATE hsCRP-Lp(a) Population

| <b>Variable</b>                     | <b>N (%)</b> |
|-------------------------------------|--------------|
| Death                               | 363 (3.5)    |
| Cardiovascular death                | 217 (2.1)    |
| *Myocardial infarction              | 429 (4.1)    |
| *Stroke                             | 159 (1.5)    |
| Coronary revascularization          | 857 (8.2)    |
| Hospitalization for unstable angina | 248 (2.4)    |
| **MACE                              | 714 (6.8)    |

\*Includes fatal and non-fatal events

\*\*MACE is defined as the composite of cardiovascular death, myocardial infarction or stroke

**eTable 4.** Relationships Between MACE Stratified According to Achieved hsCRP and Lp(a) Quintiles in the Placebo Group Only

| Population                                                                        | n/N (Kaplan-Meier estimate) | MACE HR (95% CI)  | P Value |
|-----------------------------------------------------------------------------------|-----------------------------|-------------------|---------|
| <b>hsCRP &lt;2</b>                                                                |                             |                   |         |
| *Lp(a) Q1                                                                         | 37/601 (6.6)                | 1.0               | Ref     |
| Lp(a) Q2                                                                          | 32/606 (6.0)                | 0.84 (0.52, 1.35) | 0.47    |
| Lp(a) Q3                                                                          | 29/585 (5.9)                | 0.79 (0.48, 1.30) | 0.35    |
| Lp(a) Q4                                                                          | 30/582 (5.8)                | 0.81 (0.50, 1.32) | 0.40    |
| Lp(a) Q5                                                                          | 27/595 (4.6)                | 0.70 (0.42, 1.16) | 0.17    |
| <b>hsCRP ≥2</b>                                                                   |                             |                   |         |
| *Lp(a) Q1                                                                         | 25/449 (6.1)                | 1.0               | Ref     |
| Lp(a) Q2                                                                          | 40/444 (10.8)               | 1.69 (1.02, 2.79) | 0.042   |
| Lp(a) Q3                                                                          | 45/465 (10.9)               | 1.87 (1.15, 3.06) | 0.012   |
| Lp(a) Q4                                                                          | 45/468 (10.7)               | 1.74 (1.06, 2.84) | 0.028   |
| Lp(a) Q5                                                                          | 48/455 (11.8)               | 1.91 (1.17, 3.11) | 0.01    |
| <b>P<sub>interaction</sub> between Lp(a) quintile and hsCRP for MACE is 0.008</b> |                             |                   |         |

Hazard ratio (HR) and confidence intervals (CI) are adjusted for age, sex, race, region, diabetes mellitus, smoking, baseline LDL-C, and baseline HDL-C

All hsCRP and Lp(a) levels are time-weighted average; hsCRP measured in mg/L; Lp(a) measured in nmol/L

MACE: cardiovascular death/myocardial infarction/stroke

Median (range) Lp(a) values per Lp(a) quintile: Q1 8.2 (3.1-9.8); Q2 14.6 (9.9-20.3); Q3 30.2 (20.4-46.9); Q4 84.8 (47.0-135.5); Q5 193.9 (135.6-7681)

\*Each subsequent quintile (Q) is compared with the first quintile

**eTable 5.** Associations Between MACE Stratified According to Achieved hsCRP and Continuous Lp(a) Levels in the Placebo Group Only

|             | hsCRP <2<br>HR (95% CI) | P Value | hsCRP ≥2<br>HR (95% CI) | P Value | P <sub>interaction</sub> |
|-------------|-------------------------|---------|-------------------------|---------|--------------------------|
| <b>MACE</b> |                         |         |                         |         |                          |
| Log Lp(a)   | 0.93 (0.82, 1.06)       | 0.30    | 1.15 (1.02, 1.29)       | 0.019   | 0.016                    |

All hsCRP and Lp(a) levels are time-weighted average; hsCRP measured in mg/L; Lp(a) measured in nmol/L

MACE: Cardiovascular death/myocardial infarction/stroke

Hazard ratio (HR) and confidence intervals (CI) are adjusted for age, sex, race, region, diabetes mellitus, smoking, baseline LDL-C, baseline HDL-C

**eTable 6.** Relationships Between Primary MACE End Point Stratified According to Achieved hsCRP and Lp(a) Quintiles

| Population                                                                                    | n/N (%) (Kaplan-Meier estimate)                                                             | MACE HR (95 CI)                                                                         | P Value                               |
|-----------------------------------------------------------------------------------------------|---------------------------------------------------------------------------------------------|-----------------------------------------------------------------------------------------|---------------------------------------|
| <b>Overall hsCRP population</b><br>hsCRP <2<br>hsCRP ≥2                                       | 592/5609 (11.2)<br>712/4894 (16.0)                                                          | 1.0<br>1.31 (1.17, 1.47)                                                                | Ref<br><0.001                         |
| <b>Overall Lp(a) population</b><br>Lp(a) <median<br>Lp(a) ≥median                             | 611/5251 (12.6)<br>693/5252 (14.3)                                                          | 1.0<br>1.10 (0.98, 1.23)                                                                | Ref<br>0.092                          |
| <b>hsCRP &lt;2</b><br>*Lp(a) Q1<br>Lp(a) Q2<br>Lp(a) Q3<br>Lp(a) Q4<br>Lp(a) Q5               | 112/1154 (10.1)<br>111/1129 (10.6)<br>117/1113 (11.3)<br>109/1103 (10.6)<br>143/1110 (13.5) | 1.0<br>1.00 (0.77, 1.31)<br>1.09 (0.83, 1.42)<br>1.00 (0.76, 1.31)<br>1.30 (1.00, 1.67) | Ref<br>0.99<br>0.54<br>0.97<br>0.046  |
| <b>hsCRP ≥2</b><br>*Lp(a) Q1<br>Lp(a) Q2<br>Lp(a) Q3<br>Lp(a) Q4<br>Lp(a) Q5                  | 112/946 (13.1)<br>128/972 (14.4)<br>139/988 (15.7)<br>168/998 (18.9)<br>165/990 (17.9)      | 1.0<br>1.08 (0.84, 1.40)<br>1.20 (0.94, 1.55)<br>1.38 (1.08, 1.77)<br>1.40 (1.09, 1.79) | Ref<br>0.54<br>0.15<br>0.010<br>0.008 |
| <b>P<sub>interaction</sub> between Lp(a) quintile and hsCRP ≥2 vs. &lt;2 for MACE is 0.39</b> |                                                                                             |                                                                                         |                                       |

Hazard ratio (HR) and confidence intervals (CI) are adjusted for age, sex, race, region, diabetes mellitus, smoking, baseline LDL-C, baseline HDL-C and randomization/treatment group

All hsCRP and Lp(a) levels are time-weighted average; hsCRP measured in mg/L; Lp(a) measured in nmol/L

Primary MACE endpoint:

Cardiovascular death/myocardial infarction/stroke/coronary revascularization/hospitalization for unstable angina

Median (range) Lp(a) values per Lp(a) quintile: Q1 8.2 (2.2-8.4); Q2 11.1 (8.5-15.7); Q3 22.9 (15.8-37.5); Q4 71.7 (37.6-125.4); Q5 183.4 (125.5-7681)

\*Each subsequent quintile (Q) is compared with the first quintile

**eTable 7.** Associations Between Primary MACE End Point Stratified According to Achieved hsCRP and Continuous Lp(a) Levels

|                    | hsCRP <2<br>HR (95% CI) | P Value | hsCRP ≥2<br>HR (95% CI) | P Value | P <sub>interaction</sub> |
|--------------------|-------------------------|---------|-------------------------|---------|--------------------------|
| <b>MACE</b>        |                         |         |                         |         |                          |
| Logarithm of Lp(a) | 1.06 (1.00, 1.14)       | 0.065   | 1.11 (1.05, 1.18)       | 0.001   | 0.46                     |

Hazard ratio (HR) and confidence intervals (CI) are adjusted for age, sex, race, region, diabetes mellitus, smoking, baseline LDL-C, baseline HDL-C, and randomization/treatment group

All hsCRP and Lp(a) levels are time-weighted average; hsCRP measured in mg/L; Lp(a) measured in nmol/L

Primary MACE endpoint:

Cardiovascular death/myocardial infarction/stroke/coronary revascularization/hospitalization for unstable angina



**eTable 8.** Relationships Between hsCRP and Lp(a) as Continuous Variables Upon MACE

| <b>Interaction (*)</b>               | <b>Univariate <math>P_{\text{interaction}}</math></b> | <b>Multivariable <math>P_{\text{interaction}}</math></b> |
|--------------------------------------|-------------------------------------------------------|----------------------------------------------------------|
| Continuous (log)hsCRP*Lp(a) quintile | 0.014                                                 | 0.012                                                    |
| Continuous Lp(a)*hsCRP quintile      | 0.068                                                 | 0.10                                                     |

Multivariable model djusted for age, sex, race, region, diabetes mellitus, smoking, baseline LDL-C, baseline HDL-C, and randomization/treatment group

All hsCRP and Lp(a) levels are time-weighted average; hsCRP measured in mg/L; Lp(a) measured in nmol/L

MACE: Cardiovascular death/myocardial infarction/stroke

**eFigure 1.** Cumulative Incidence of MACE Over Time Stratified According to Lp(a) Quintiles in the Setting of hsCRP Levels <2 mg/L (A) or ≥2 mg/L (B)

This represents the population that did not receive evacetrapib (ie, the placebo group of ACCELERATE).

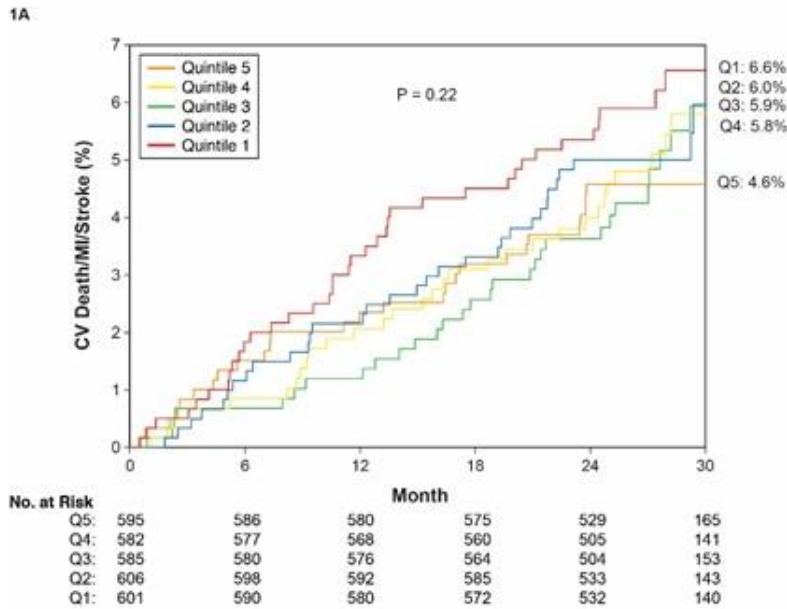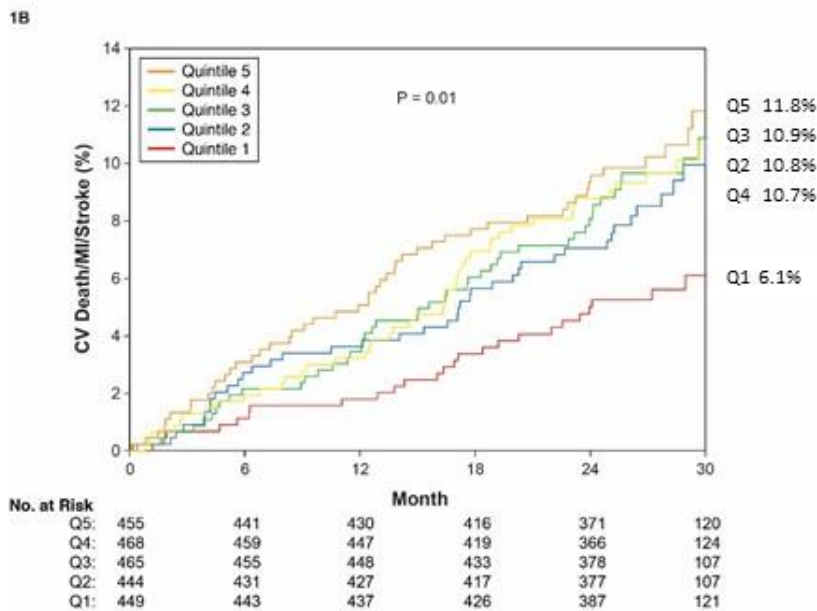

**eFigure 2. CONSORT Diagram**

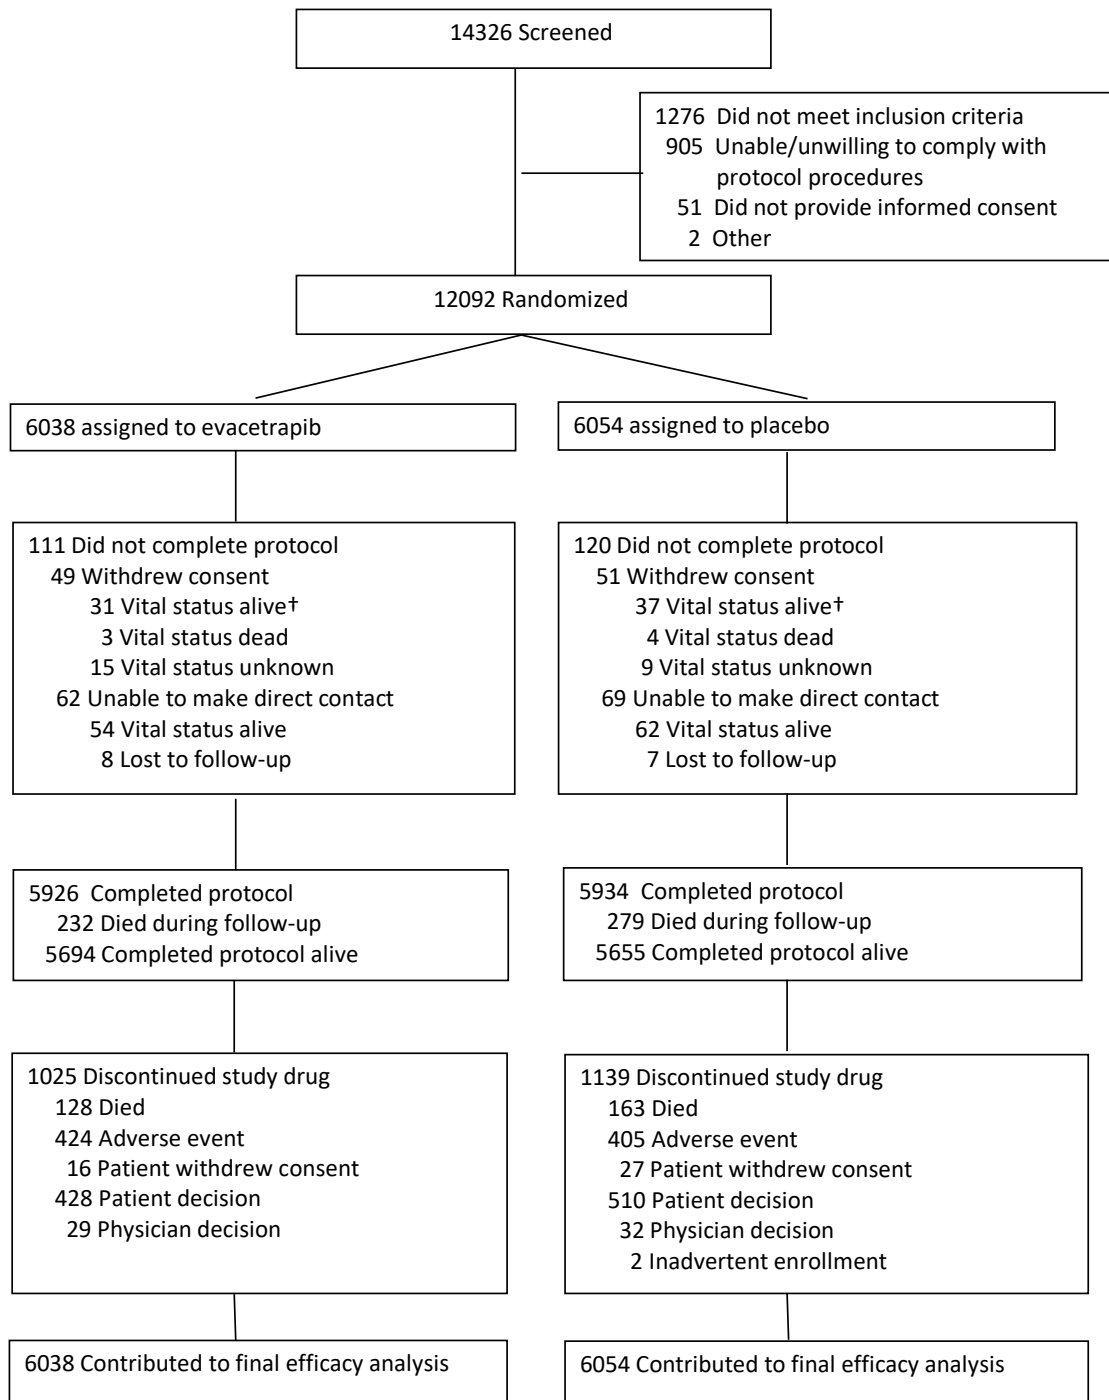

† Verification of alive status based on absence in the death registry
